# Supplementary material
Source: Research Square preprint supplement (doi:10.21203/rs.3.rs-10420122/v1)
Supplement: Supplementary file 1 [file 14942beb6016fbf8f26d7ef1.docx]

**Supplementary Methods**

**1.1 Subjects and study design**

This study was conducted at the Department of Burns and Plastic Surgery, University Hospital Brno, Czech Republic. Ethical approval (No. 05-061020/EK, October 6, 2020) has been granted for this project in accordance with the principles of the Declaration of Helsinki. All participants were informed about the study process and risks arising from the study and signed an informed consent. Fifty adult burn patients, who used LAN as stress ulcers prophylaxis, were enrolled in this study.

Inclusion criteria were: i) age ≥18 years, ii) individuals of European ancestry, iii) signing informed consent; exclusion criteria were: i) patients with second-degree (IIa–IIb) or worse burns involving more than 20% of the total body surface area (TBSA), ii) patients with hepatic dysfunction classified as Child-Pugh B or C, iii) patients with medications that affect the metabolic activity of the CYP2C19 enzyme (chloramphenicol, cimetidine, citalopram, fluoxetine, fluvoxamine, indomethacin, isoniazid, ketoconazole, modafinil, ticlopidine, topiramate, voriconazole, carbamazepine, efavirenz, enzalutamide, rifampicin, ritonavir; atazanavir, cilostazol, citalopram, dacomitinib, dasatinib, erlotinib, clopidogrel, methotrexate, nelfinavir, neratinib, pazopanib, rilpavirine, tacrolimus) and medications with known serious drug-drug interactions with PPIs.

Clinical data and data on exposure factors were obtained from patients’ electronic medical records. Namely, these data included age, sex, nationality, body mass index (BMI), weight, height, smoking, substance abuse (alcohol and/or drugs), health status, total body surface area (TBSA in %), the presence of deep necrosis, the presence of inhalation injury, and the abbreviated burn severity index (ABSI). Each patient was assigned a unique identifier, and analysis was performed on such deidentified samples.

**1.2 Sample collection**

In the morning hours, patients took 30 mg of LAN (Lanzul®) on an empty stomach 30 minutes to 60 minutes before the first meal. The whole venous blood specimens were collected into 9 ml K3EDTA (S-Monovette) 3 hours later. To prevent the sample from being exposed to light, the collection tube was covered with aluminium foil. During the collection process, care was taken to avoid contamination of the sample by disinfectant. The time of collection was recorded. Immediately after blood collection, the sample was transported at 4 °C to the laboratory and processed within half an hour. After centrifugation (2000 x *g*, 10 min, 4°C), plasma was separated and stored at -80°C until determination of the analytes. The rest of the blood was diluted with distilled water to 30 ml and stored at -20°C till DNA isolation. Any deviations from the protocol were recorded.

**1.3 DNA isolation and *CYP2C19* genotyping**

The DNA was isolated by the chloroform extraction method. DNA was eluted into the TE buffer. Concentration was measured by Multidetection Reader Synergy HTX (BioTek), and DNA was diluted by PCR-quality water to 50 ng/µl, preparing it for the subsequent analysis. A qPCR genotyping analysis for the determination of *CYP2C19**2 and *CYP2C19**17 single-nucleotide variants was performed on the LightCycler® 480 Instrument (Roche Diagnostics, Indianapolis, USA). The reaction mixture for the 10 µl reaction was as described previously [1], namely: for *CYP2C19**17, 0.7 ul TaqMan™ Drug Metabolism Genotyping Assays (C____469857_10; ThermoFisher Scientific, Applied Biosystems™, Carlsbad, USA), 5 ul Luna® Universal Probe qPCR Master Mix (New England BioLabs® Inc.), and 3.3 µl PCR grade water. For *CYP2C19**2: 0.25 µl TaqMan™ Drug Metabolism Genotyping Assays (C__25986767_70; ThermoFisher Scientific, Applied Biosystems™, Carlsbad, USA), 5 µl FastStart Essential DNA Probes Master (Roche Diagnostics, Indianapolis, USA), and 3.75 µl PCR grade water. Reaction conditions for *CYP2C19**17 were as follows: preincubation at 95°C, 60 s, 1 cycle; amplification at 95°C, 15 s, and 64°C, 35 s, both steps for 45 cycles. Reaction conditions for *CYP2C19**2 were different: preincubation at 95°C, 600 s, 1 cycle; amplification at 95°C, 15 s, and 62°C, 30 s, both steps for 40 cycles; and cooling to 37°C, 30 s, 1 cycle. The data were evaluated using LightCycler® 480 SW 1.5.1.

**1.4 HPLC analysis of lansoprazole and 5-hydroxylansoprazole**

Measurements of the plasma concentrations of LAN and its metabolites OHL and LS were performed using HPLC UV and HPLC MS according to a previously optimized protocol [2].

**References**

[1] Bořilová Linhartová P, Bartošová L, Křenek A, Bartoš L, Dolina J, Marek F, et al. Personalized therapy in patients with gastroesophageal reflux disease – methodology of CYP2C19 gene profile‘s determination. Gastroent Hepatol 2018;72:320–8. https://doi.org/10.14735/amgh2018320.

[2] Kostolanská K, Peš O, Zendulka O, Máchal J, Juřica J. Determination of lansoprazole, 5-hydroxylansoprazole, and lansoprazole sulfone in human plasma for CYP2C19 and CYP3A4 phenotyping. Chem Pap 2019;73:2955–63. https://doi.org/10.1007/s11696-019-00682-4.
