# Supplementary material
Source: Research Square preprint supplement (doi:10.21203/rs.3.rs-10420122/v1)
Supplement: Supplementary file 2 [file ea35bbaa735e80c4f11eefce.docx]

**Supplementary Tables**

**Supplementary Table S1.** An overview of studied variables grouped by predicted CYP2C19 phenotype.

|  | Total  N = 50 | PM+IM  N = 10 (20%) | EM  N = 15 (30%) | UM  N = 17 (34%) | AM  N = 8  (16%) | adjusted *p*-value |
| --- | --- | --- | --- | --- | --- | --- |
| sex - male | 35 (70 %) | 6 (60 %) | 9 (60 %) | 13 (76.47 %) | 7 (87.5 %) | 1 |
| sex - female | 15 (30 %) | 4 (40 %) | 6 (40 %) | 4 (23.53 %) | 1 (12.5 %) |  |
| age [years] | 44.84 ± 14.29 | 42±14.13 | 45.87±16 | 43.29±12.19 | 49.75±16.56 | 1 |
| BMI | 28.23 ± 6.65 | 26.25±5.45 | 26.65±4.03 | 31.18±9.14 | 27.39±3.84 | 1 |
| TBSA [%] | 5.49 ± 4.76 | 4.72±3.06 | 6.02±5.33 | 6.4±5.78 | 3.53±2.35 | 1 |
| smoking - never | 30 (60 %) | 7 (70 %) | 8 (53.33 %) | 9 (52.94 %) | 6 (75 %) | 1 |
| smoking - former | 3 (6 %) | 0 (0 %) | 1 (6.67 %) | 1 (5.88 %) | 1 (12.5 %) |  |
| smoking - current | 17 (34 %) | 3 (30 %) | 6 (40 %) | 7 (41.18 %) | 1 (12.5 %) |  |
| substance abuse - no | 39 (78 %) | 9 (90 %) | 11 (73.33 %) | 11 (64.71 %) | 8 (100 %) | 1 |
| substance abuse - yes | 11 (22 %) | 1 (10 %) | 4 (26.67 %) | 6 (35.29 %) | 0 (0 %) |  |
| LAN [ng/ml], log10 | 2.6 ± 0.4 | 2.61±0.61 | 2.63±0.36 | 2.51±0.36 | 2.72±0.23 | 1 |
| OHL [ng/ml], log10 | 0.74 ± 0.41 | 0.69±0.55 | 0.67±0.4 | 0.73±0.38 | 0.94±0.34 | 1 |
| LS [ng/ml], log10 | 0.67 ± 0.88 | 0.58±1.71 | 0.84±0.64 | 0.59±0.56 | 0.68±0.37 | 1 |
| LAN/OHL, log2 | 6.19 ± 1.36 | 6.35±1.55 | 6.52±1.49 | 5.92±1.39 | 5.94±0.63 | 1 |
| LAN/LS, log2 | 6.4 ± 1.91 | 6.74±3.85 | 5.96±1.08 | 6.4±1.08 | 6.81±0.87 | 1 |
| OHL/LS, log2 | 0.21 ± 2.74 | 0.39±4.72 | -0.55±2.29 | 0.49±2.14 | 0.86±1.02 | 1 |

Mean±standard deviation is reported for numerical variables, absolute and relative frequencies for categorical ones. Differences among groups were tested using ANOVA for numerical variables and Fisher exact test for categorical variables; *p*-values were adjusted using the Benjamini-Hochberg method.

BMI, body mass index; TBSA, total burn surface area; PM, poor metabolizer; IM, intermediate metabolizer; EM, extensive metabolizer; AM, ambivalent metabolizer; UM, ultrarapid metabolizer; LAN, lansoprazole; OHL, 5-hydroxylansoprazole; LS, lansoprazolesulphone

**Supplementary Table S2.** Overview of *CYP2C19**2 and *CYP2C19**17 allele frequencies and predicted phenotypes.

|  |  | *CYP2C19**17 | | |
| --- | --- | --- | --- | --- |
|  |  | CC | CT | TT |
| *CYP2C19**2 | AA | 1 (PM) | 0 | 0 |
| AG | 9 (IM) | 8 (AM) | 0 |
| GG | 15 (EM) | 14 (UM) | 3 (UM) |

PM, poor metabolizer; IM, intermediate metabolizer; EM, extensive metabolizer; AM, ambivalent metabolizer; UM, ultrarapid metabolizer

**Supplementary Table S3.** Results of multivariate linear regression with concentrations of lansoprazol and its metabolites as responses.

| **Response variable** | **Term** | **Estimate** | **Std. Error** | **T-value** | **Pr(>|t|)** | **Model quality** |
| --- | --- | --- | --- | --- | --- | --- |
| log(LAN) | (Intercept) | 2.3138 | 0.3183 | 7.2687 | 0.0000 | Multiple R-squared: 0.1929 Adjusted R-squared: -0.01411 F-statistic: 0.9318 on 10 and 39 DF p-value: 0.5154 |
| Sex (female) | 0.1408 | 0.1405 | 1.0017 | 0.3227 |
| age [years] | 0.0095 | 0.0045 | 2.0987 | 0.0424 |
| BMI | -0.0085 | 0.0106 | -0.7977 | 0.4299 |
| TBSA [%] | 0.0085 | 0.0137 | 0.6195 | 0.5392 |
| phenotype EM | -0.0026 | 0.1695 | -0.0154 | 0.9878 |
| phenotype UM | -0.0343 | 0.1731 | -0.1981 | 0.8440 |
| phenotype AM | 0.1377 | 0.2063 | 0.6672 | 0.5086 |
| smoking - former | -0.2088 | 0.2816 | -0.7416 | 0.4628 |
| smoking- current | 0.0961 | 0.1430 | 0.6720 | 0.5056 |
| substanceAbuse (yes) | -0.0794 | 0.1828 | -0.4343 | 0.6665 |
| log(OHL) | (Intercept) | 0.9551 | 0.2910 | 3.2819 | 0.0022 | Multiple R-squared: 0.3623 Adjusted R-squared: 0.1988 F-statistic: 2.216 on 10 and 39 DF p-value: 0.03737 |
| Sex (female) | 0.2905 | 0.1285 | 2.2609 | 0.0294 |
| age [years] | -0.0022 | 0.0041 | -0.5220 | 0.6047 |
| BMI | -0.0081 | 0.0097 | -0.8321 | 0.4104 |
| TBSA [%] | -0.0093 | 0.0126 | -0.7418 | 0.4626 |
| phenotype EM | 0.0579 | 0.1550 | 0.3736 | 0.7107 |
| phenotype UM | 0.2224 | 0.1582 | 1.4059 | 0.1677 |
| phenotype AM | 0.3368 | 0.1886 | 1.7857 | 0.0819 |
| smoking - former | -0.2338 | 0.2574 | -0.9083 | 0.3693 |
| smoking- current | -0.0203 | 0.1307 | -0.1553 | 0.8774 |
| substanceAbuse (yes) | -0.2492 | 0.1671 | -1.4910 | 0.1440 |
| log(LS) | (Intercept) | -0.4386 | 0.7336 | -0.5980 | 0.5533 | Multiple R-squared: 0.1125 Adjusted R-squared: -0.1151 F-statistic: 0.4943 on 10 and 39 DF p-value: 0.8834 |
| Sex (female) | 0.2915 | 0.3239 | 0.9001 | 0.3736 |
| age [years] | 0.0133 | 0.0104 | 1.2802 | 0.2080 |
| BMI | 0.0087 | 0.0244 | 0.3578 | 0.7224 |
| TBSA [%] | 0.0188 | 0.0316 | 0.5951 | 0.5552 |
| phenotype EM | 0.1936 | 0.3906 | 0.4955 | 0.6230 |
| phenotype UM | -0.0349 | 0.3988 | -0.0875 | 0.9308 |
| phenotype AM | 0.1701 | 0.4755 | 0.3578 | 0.7224 |
| smoking - former | -0.5270 | 0.6489 | -0.8122 | 0.4216 |
| smoking- current | 0.0402 | 0.3295 | 0.1219 | 0.9036 |
| substanceAbuse (yes) | 0.0998 | 0.4213 | 0.2369 | 0.8140 |

EM, extensive metabolizer; AM, ambivalent metabolizer; UM, ultrarapid metabolizer; DF, degrees of freedom

**Supplementary Table S4.** Results of multivariate linear regression with ratios of concentrations of lansoprazol and its metabolites as responses.

| **Response variable** | **Term** | **Estimate** | **Std. Error** | **t-value** | **Pr(>|t|)** | **Model quality** |
| --- | --- | --- | --- | --- | --- | --- |
| log(LAN/OHL) | (Intercept) | 4.5136 | 0.9556 | 4.7234 | 0.0000 | Multiple R-squared: 0.3596 Adjusted R-squared: 0.1954 F-statistic: 2.19 on 10 and 39 DF p-value: 0.03959 |
| log(LAN/OHL) | Sex (female) | -0.4973 | 0.4219 | -1.1787 | 0.2457 |
| log(LAN/OHL) | age [years] | 0.0386 | 0.0136 | 2.8504 | 0.0069 |
| log(LAN/OHL) | BMI | -0.0013 | 0.0318 | -0.0410 | 0.9675 |
| log(LAN/OHL) | TBSA [%] | 0.0592 | 0.0412 | 1.4360 | 0.1590 |
| log(LAN/OHL) | phenotype EM | -0.2010 | 0.5089 | -0.3950 | 0.6950 |
| log(LAN/OHL) | phenotype UM | -0.8528 | 0.5195 | -1.6415 | 0.1087 |
| log(LAN/OHL) | phenotype AM | -0.6616 | 0.6194 | -1.0681 | 0.2920 |
| log(LAN/OHL) | smoking - former | 0.0831 | 0.8452 | 0.0983 | 0.9222 |
| log(LAN/OHL) | smoking- current | 0.3866 | 0.4292 | 0.9007 | 0.3733 |
| log(LAN/OHL) | substanceAbuse (yes) | 0.5640 | 0.5488 | 1.0277 | 0.3104 |
| log(OHL/LS) | (Intercept) | 4.6298 | 2.1383 | 2.1652 | 0.0366 | Multiple R-squared: 0.2129 Adjusted R-squared: 0.01111 F-statistic: 1.055 on 10 and 39 DF p-value: 0.4185 |
| log(OHL/LS) | Sex (female) | -0.0034 | 0.9441 | -0.0036 | 0.9971 |
| log(OHL/LS) | age [years] | -0.0514 | 0.0303 | -1.6950 | 0.0981 |
| log(OHL/LS) | BMI | -0.0558 | 0.0712 | -0.7840 | 0.4378 |
| log(OHL/LS) | TBSA [%] | -0.0935 | 0.0922 | -1.0136 | 0.3170 |
| log(OHL/LS) | phenotype EM | -0.4506 | 1.1386 | -0.3958 | 0.6944 |
| log(OHL/LS) | phenotype UM | 0.8548 | 1.1625 | 0.7353 | 0.4666 |
| log(OHL/LS) | phenotype AM | 0.5538 | 1.3860 | 0.3996 | 0.6917 |
| log(OHL/LS) | smoking - former | 0.9741 | 1.8913 | 0.5150 | 0.6095 |
| log(OHL/LS) | smoking- current | -0.2008 | 0.9604 | -0.2091 | 0.8355 |
| log(OHL/LS) | substanceAbuse (yes) | -1.1593 | 1.2280 | -0.9440 | 0.3510 |
| log(LAN/LS) | (Intercept) | 9.1433 | 1.5871 | 5.7610 | 0.0000 | Multiple R-squared: 0.1086 Adjusted R-squared: -0.12  F-statistic: 0.4749 on 10 and 39 DF p-value: 0.896 |
| log(LAN/LS) | Sex (female) | -0.5007 | 0.7007 | -0.7146 | 0.4791 |
| log(LAN/LS) | age [years] | -0.0128 | 0.0225 | -0.5674 | 0.5737 |
| log(LAN/LS) | BMI | -0.0571 | 0.0529 | -1.0809 | 0.2864 |
| log(LAN/LS) | TBSA [%] | -0.0343 | 0.0685 | -0.5009 | 0.6192 |
| log(LAN/LS) | phenotype EM | -0.6516 | 0.8452 | -0.7710 | 0.4453 |
| log(LAN/LS) | phenotype UM | 0.0020 | 0.8629 | 0.0023 | 0.9982 |
| log(LAN/LS) | phenotype AM | -0.1078 | 1.0288 | -0.1048 | 0.9171 |
| log(LAN/LS) | smoking - former | 1.0571 | 1.4038 | 0.7530 | 0.4560 |
| log(LAN/LS) | smoking- current | 0.1857 | 0.7128 | 0.2606 | 0.7958 |
| log(LAN/LS) | substanceAbuse (yes) | -0.5953 | 0.9115 | -0.6531 | 0.5175 |

EM, extensive metabolizer; AM, ambivalent metabolizer; UM, ultrarapid metabolizer; DF, degrees of freedom
